# Supplementary material for: GIS-Based Spatial and Multi-Criteria Assessment of Riverine Flood Potential: A Case Study of the Nitra River Basin, Slovakia
Source: MDPI journal article supplement (doi:10.3390/ijgi10090578), 2021-08-27
Supplement: s1 [file s1]

**Supplementary Materials:** The following are available online at [www.mdpi.com/xxx/s1](http://www.mdpi.com/xxx/s1), Table S1: Derived curve numbers, Table S2: Zones of rock types and their corresponding degree of permeability, Figure S1: Flood conditioning factors: a) elevation, b) slope angle, Figure S2: Flood conditioning factors: a) river network density, b) distance from river, c) flow accumulation, Figure S3: Input maps: a) hydrological soil groups, b) CORINE Land Cover from 2018, Table S3: Reciprocal pair-wise comparison matrix.

**Table S1.** Derived curve numbers.

| CORINE Land Cover (CLC) class                                                              | Hydrological soil group |     |
|--------------------------------------------------------------------------------------------|-------------------------|-----|
|                                                                                            | B                       | C   |
| 111 Continuous urban fabric                                                                | 85                      | 90  |
| 112 Discontinuous urban fabric                                                             | 75                      | 83  |
| 121 Industrial or commercial units                                                         | 88                      | 91  |
| 122 Road and rail networks and associated land                                             | 89                      | 92  |
| 131 Mineral extraction sites                                                               | 77                      | 85  |
| 132 Dump sites                                                                             | 77                      | 85  |
| 133 Construction sites                                                                     | 77                      | 85  |
| 141 Green urban areas                                                                      | 69                      | 79  |
| 142 Sport and leisure facilities                                                           | 79                      | 86  |
| 211 Non-irrigated arable land                                                              | 79                      | 84  |
| 221 Vineyards                                                                              | 65                      | 76  |
| 222 Fruit trees and berry plantations                                                      | 58                      | 72  |
| 231 Pastures                                                                               | 61                      | 74  |
| 242 Complex cultivation patterns                                                           | 74                      | 82  |
| 243 Land principally occupied by agriculture, with significant areas of natural vegetation | 69                      | 78  |
| 311 Broad-leaved forest                                                                    | 60                      | 73  |
| 312 Coniferous forest                                                                      | 60                      | 73  |
| 313 Mixed forest                                                                           | 60                      | 73  |
| 324 Transitional woodland-shrub                                                            | 56                      | 70  |
| 411 Inland marshes                                                                         | 100                     | 100 |
| 511 Water courses                                                                          | 100                     | 100 |
| 512 Water bodies                                                                           | 100                     | 100 |

**Table S2.** Zones of rock types and their corresponding degree of permeability.

| Zones of different rock types                         | Degree of permeability |
|-------------------------------------------------------|------------------------|
| Flyschoid rocks                                       | Very low               |
| Highly metamorphosed rocks                            | Low                    |
| Intrusive rocks                                       | Low                    |
| Effusive rocks                                        | Moderate               |
| Volcanoclastic rocks                                  | Moderate               |
| Undivided volcanic rocks                              | Moderate               |
| Conglomerate-sandstone rocks                          | Moderate               |
| Claystone-limestone rocks                             | Moderate               |
| Clay-silty sediments                                  | High                   |
| Undivided sedimentary rocks                           | High                   |
| Alternating clay-silty with sandy to gravel sediments | High                   |

|                                      |           |
|--------------------------------------|-----------|
| Organic sediments                    | High      |
| River terrace deposits               | High      |
| Deluvial deposits                    | High      |
| Proluvial deposits                   | High      |
| Aeolian sands on floodplain deposits | High      |
| Limestone-dolomite rocks             | Very high |
| Gravel-sandy sediments               | Very high |
| Quaternary carbonates                | Very high |
| Floodplain deposits                  | Very high |
| Loess deposits                       | Very high |

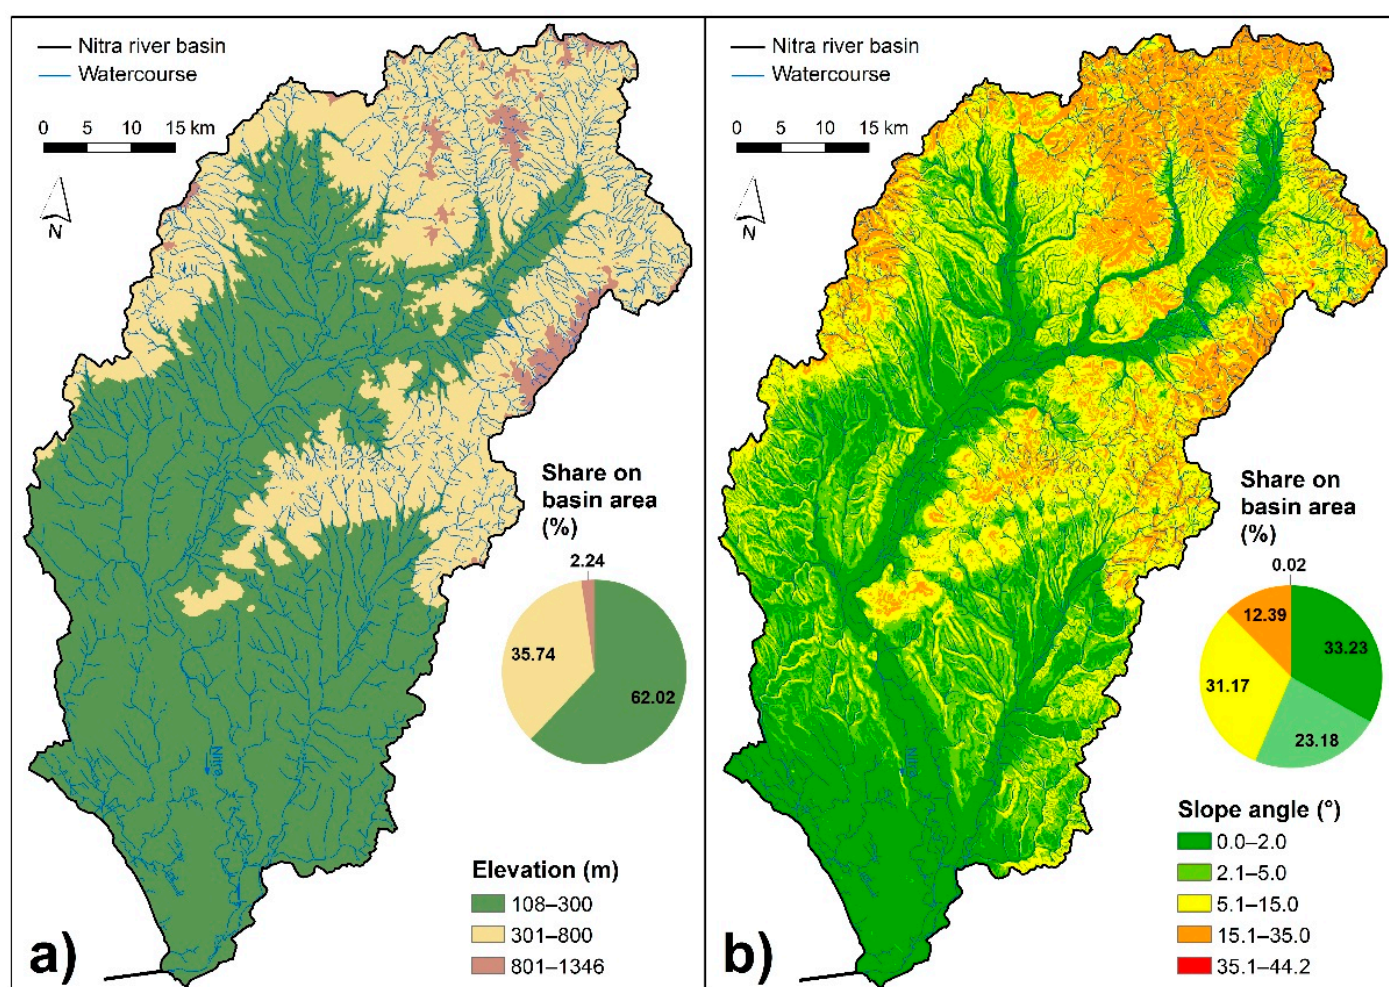

Figure S1. Flood conditioning factors: a) elevation, b) slope angle.



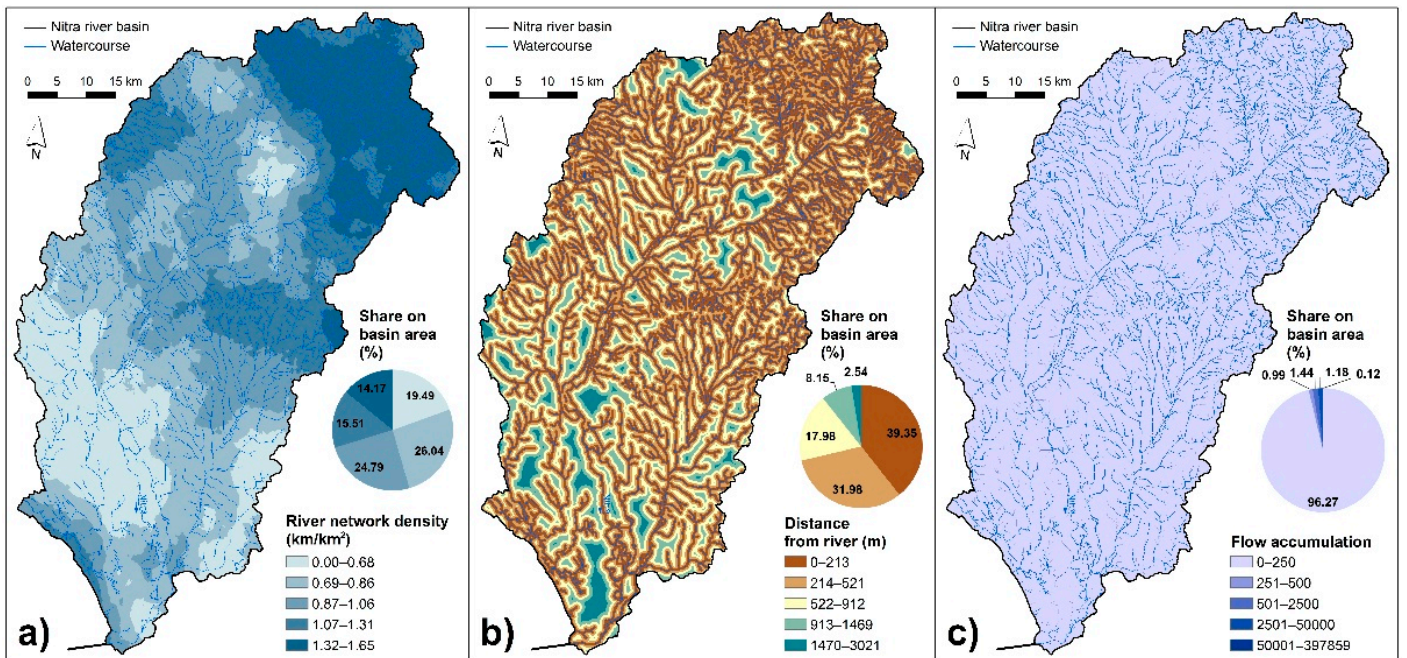

Figure S2. Flood conditioning factors: a) river network density, b) distance from river, c) flow accumulation.

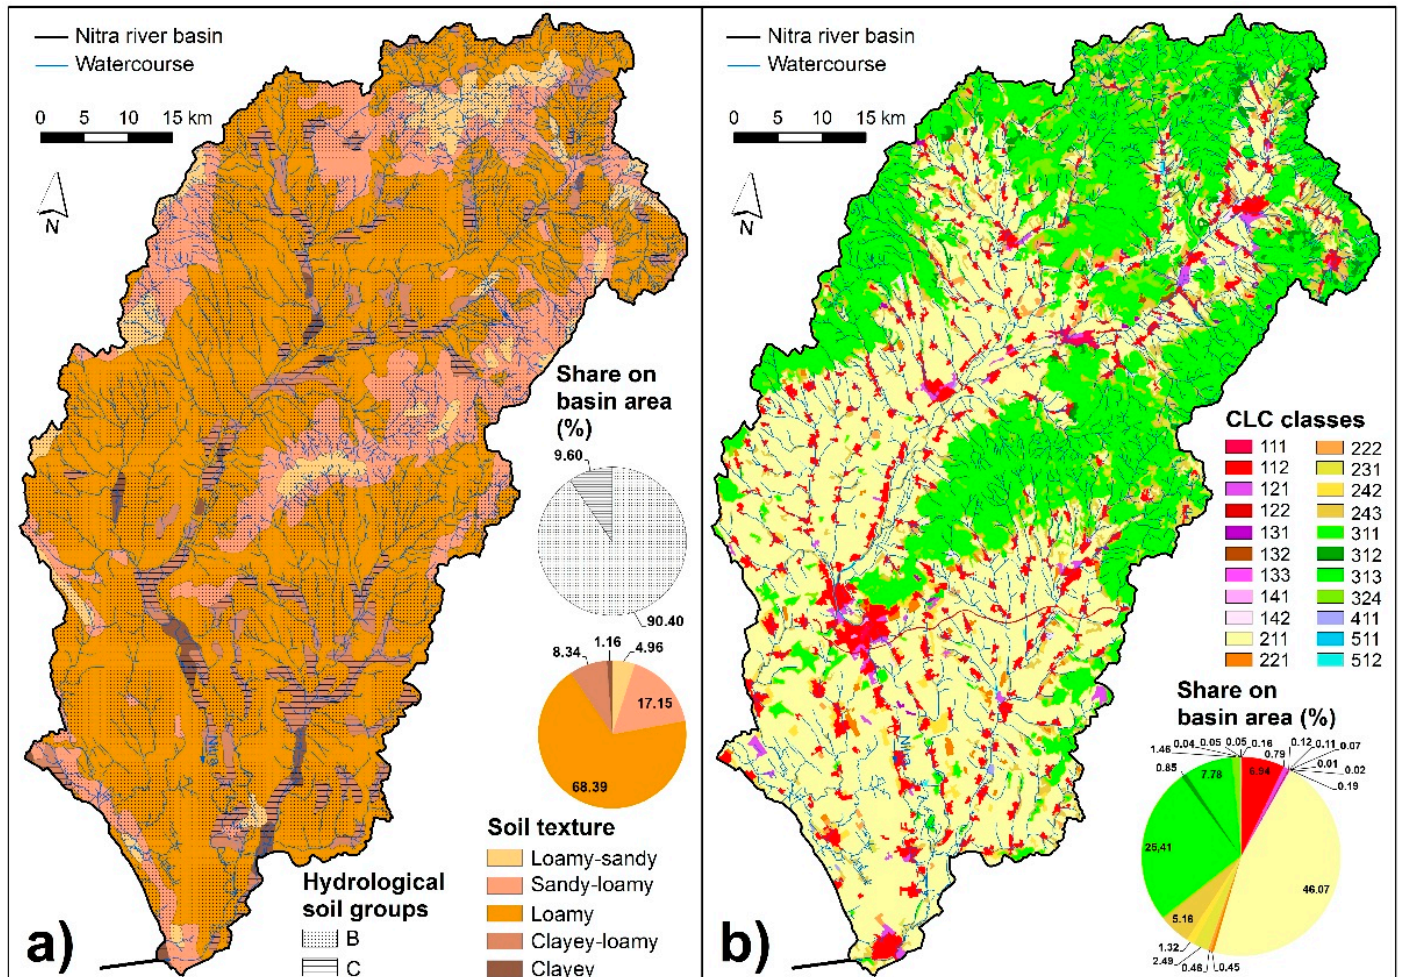

Figure S3. Input maps: a) hydrological soil groups, b) CORINE Land Cover from 2018.



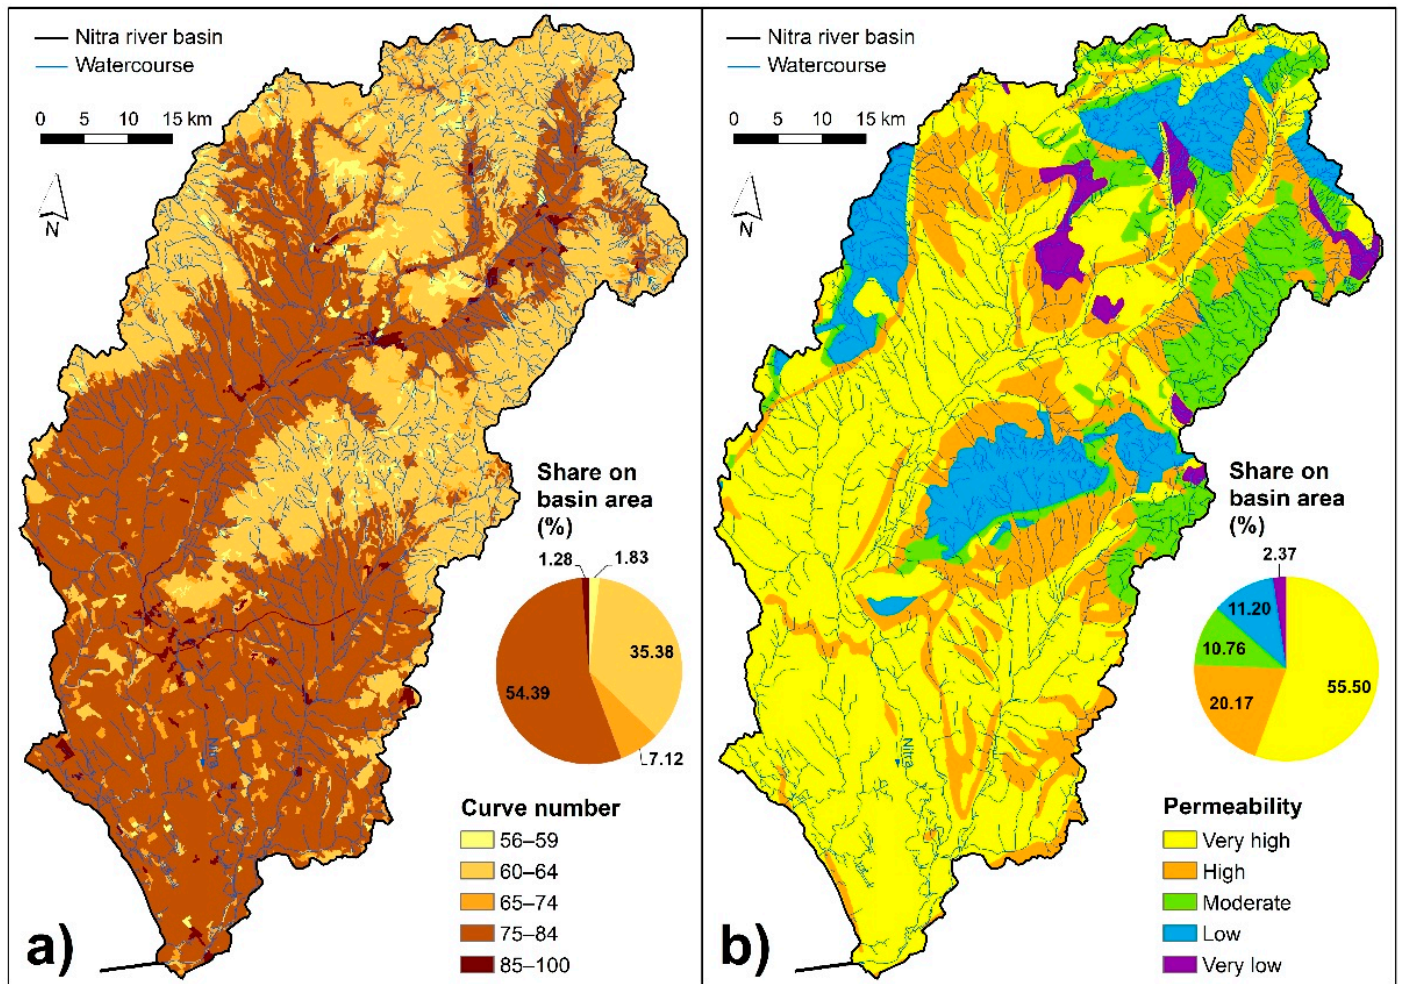

Figure S4. Flood conditioning factors: a) curve numbers, b) lithology (degree of permeability).

Table S3. Reciprocal pair-wise comparison matrix.

| Factors               | Slope | River network density | Distance from river | Flow accumulation | Elevation | Curve number | Lithology |
|-----------------------|-------|-----------------------|---------------------|-------------------|-----------|--------------|-----------|
| Slope                 | 1     | 2                     | 3                   | 4                 | 5         | 6            | 7         |
| River network density | 1/2   | 1                     | 2                   | 3                 | 4         | 5            | 6         |
| Distance from river   | 1/3   | 1/2                   | 1                   | 2                 | 3         | 4            | 5         |
| Flow accumulation     | 1/4   | 1/3                   | 1/2                 | 1                 | 2         | 3            | 4         |
| Elevation             | 1/5   | 1/4                   | 1/3                 | 1/2               | 1         | 2            | 3         |
| Curve number          | 1/6   | 1/5                   | 1/4                 | 1/3               | 1/2       | 1            | 2         |
| Lithology             | 1/7   | 1/6                   | 1/5                 | 1/4               | 1/3       | 1/2          | 1         |
